# Supplementary material for: Revealing the influencing mechanism of CO2 on SCR of NOx with NH3 over FeW mixed oxide catalyst: interactions of carbonate-Fe2O3–FeWO4
Source: Royal Society of Chemistry journal article supplement (doi:10.1039/d4nj01468e), 2024-01-01
Supplement: d4nj01468e1.pdf [file d4nj01468e1.pdf]

Electronic Supplementary Information

**Revealing the Influencing Mechanism of CO<sub>2</sub> on SCR of  
NO<sub>x</sub> with NH<sub>3</sub> over FeW Mixed Oxides Catalyst:  
interactions of carbonate-Fe<sub>2</sub>O<sub>3</sub>-FeWO<sub>4</sub>**

Hui Wang, Yujie Qiao, Xiang Li, Zhenping Qu \*

*Key Laboratory of Industrial Ecology and Environmental Engineering (MOE), School of  
Environmental Science and Technology, Dalian University of Technology, No. 2 Linggong Road,  
Dalian, 116024, China*

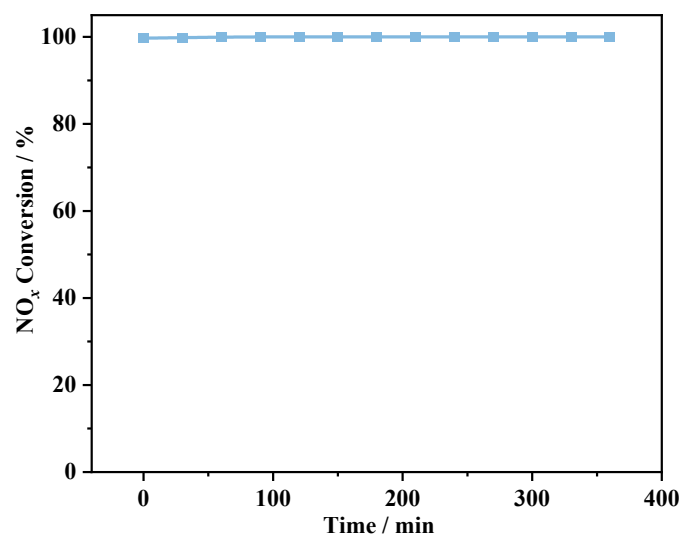

**Fig. S1.** The long-term effect of 10 vol.% CO<sub>2</sub> on NO<sub>x</sub> conversion over FeW oxides catalyst at 400 °C

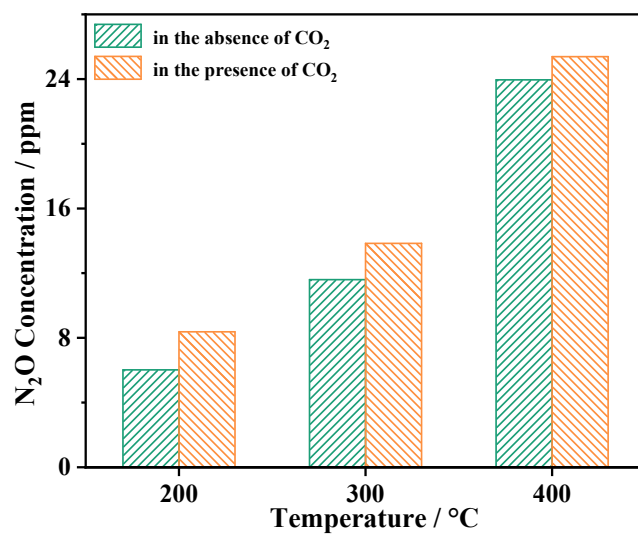

**Fig. S2.** N<sub>2</sub>O yield of FeW oxides catalyst in the presence and absence of CO<sub>2</sub>

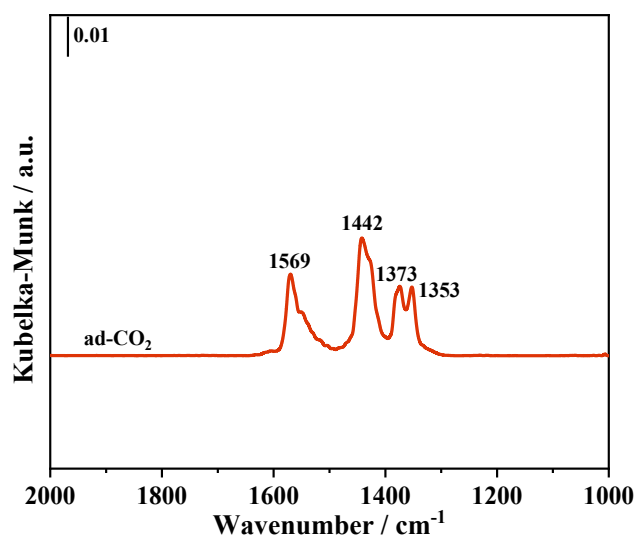

**Fig. S3.** DRIFT spectrum of CO<sub>2</sub> adsorption at 200 °C on Fe<sub>2</sub>O<sub>3</sub> catalyst

1569 cm<sup>-1</sup>: bidentate carbonate species

1442 cm<sup>-1</sup>: bicarbonate species

1373, 1353 cm<sup>-1</sup>: monodentate carbonate species

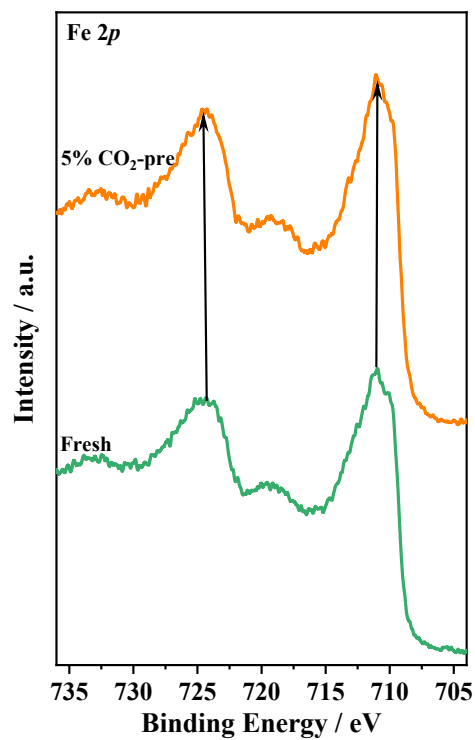

**Fig. S4.** XPS spectra of the fresh and CO<sub>2</sub> treatment Fe<sub>2</sub>O<sub>3</sub> oxides samples over the spectral regions of Fe 2*p*

It shows that the binding energy of Fe 2*p* is shifted towards higher binding energy when the injection of CO<sub>2</sub>. Combined with the results of CO<sub>2</sub> adsorption experiment, it is reasonable to elucidate that the formed CO<sub>3</sub><sup>2-</sup> species on Fe<sub>2</sub>O<sub>3</sub> catalyst can induce the electron cloud densities of Fe<sup>3+</sup> sites decrease.
